# Supplementary material
Source: PubMed Central journal article supplement (PMC2639403)
Supplement: den300_1.pdf [file den300_1.pdf]

**Supplementary Figure 1: Cell population-based SUMOylation pattern distribution in the individual phenotypes.**

Pachytene cells analyzed from four individuals were categorized based on the observed small ubiquitin-related modifier (SUMO)-1 (panel I) or SUMO-2/3 (panel II) pattern. Each chart is based on the findings for 100% of pachytene cells analyzed from each patient (A-D).

A: Control. Normal; obstructed (congenital bilateral absence of the vas deferens), absence of cystic fibrosis disease

B: hypospermatogenesis

C: hypogonadotropic hypogonadism (Kallmann syndrome)

D: Normal spermatogenesis in tissue from patient with a seminoma

I. SUMO-1

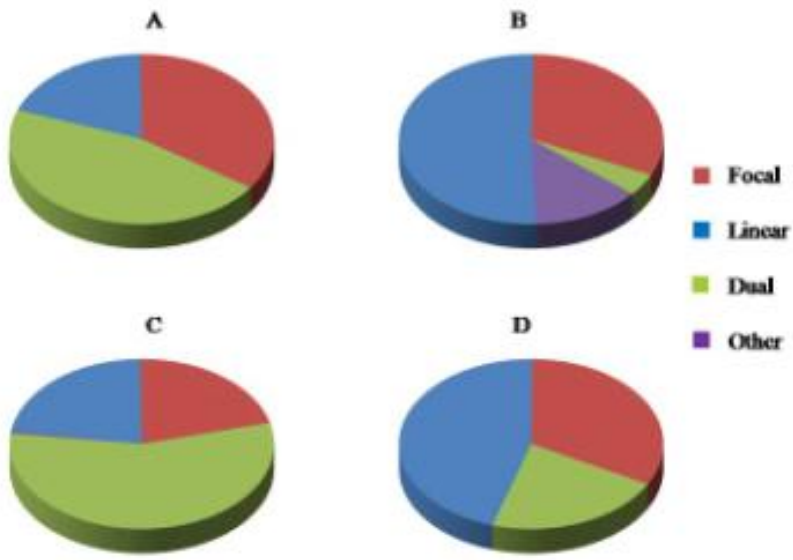

II. SUMO-2/3

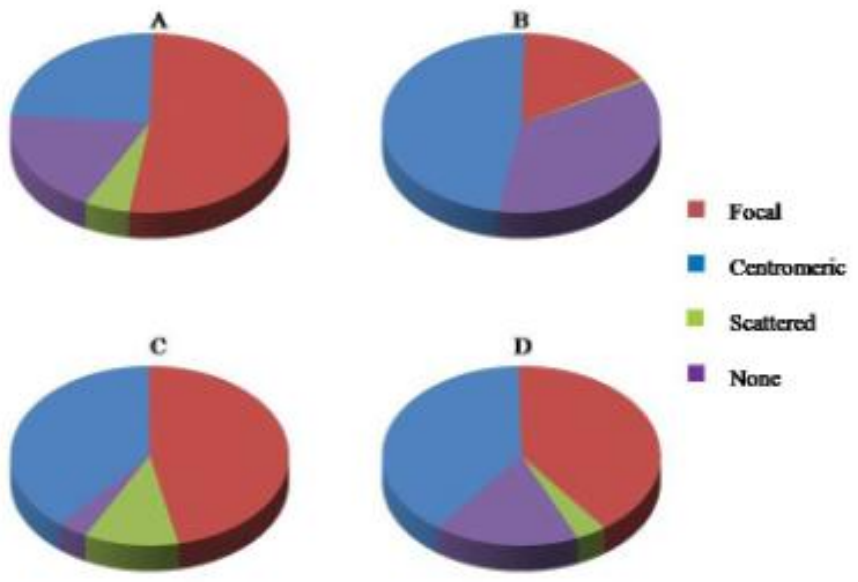

### Statistical analysis

To test for statistical significance in the altered frequencies in the patterns observed within our sample population for both SUMO-1 and SUMO-2/3, separately, we used the Chi-square test. There is a significant difference between the incidence of the three SUMO-1 patterns and “other” between the four individuals ( $\chi^2 = 164.56$ ;  $p < 0.0001$ ). When comparing the three infertile cases with normal spermatogenesis (Patient A), Patient B ( $\chi^2 = 72.0$ ;  $p < 0.0001$ ) and Patient D were highly significantly different ( $\chi^2 = 25.5$ ;  $p = 2.9 \times 10^{-6}$ ). Patient C was not significantly different from Patient A ( $\chi^2 = 7.1$ ;  $p = 0.069$ ). When comparing the four SUMO-2/3 patterns, including “none”, a significant difference was observed between the four individuals ( $\chi^2 = 136.31$ ;  $p < 0.0001$ ). When comparing the three cases with the control, Patients B, C, and D were significantly different ( $\chi^2 = 76.48$ ;  $p < 0.0001$ ;  $\chi^2 = 10.28$ ;  $p = 0.016$ ;  $\chi^2 = 34.10$ ;  $p = 1.9 \times 10^{-7}$ , respectively).
